# Supplementary material
Source: PubMed Central journal article supplement (PMC2791583)
Supplement: 0909428106_0909428106SI.pdf [file 0909428106_0909428106SI.pdf]

# Supporting Information

Salk et al. 10.1073/pnas.0909428106

## Materials and Methods

**Specimens.** For initial studies, biopsies were harvested from the colons of 19 UC patients: 11 with cancer or high-grade dysplasia (Progressors) and 8 without (Non-Progressors). Samples were obtained either at colonoscopy (3 UC Non-Progressors, 1 UC Progressor) or immediately following colectomy (5 UC Non-Progressors, 7 UC Progressors) in accordance with approved Human Subject's Guidelines at the University of Washington. Colectomy specimens came from surgeries performed for intractable symptoms, emergent hemorrhage, sepsis or the presence of high-grade dysplasia or cancer found during colonoscopy. Progression status was determined by histological assessment of 44–144 biopsies depending on whether samples were obtained at colonoscopy or colectomy. Biopsies were evenly spaced along the colon with diagnosis for dysplasia made according to DMSG consensus criteria (1) by a GI pathologist (author MPB). Selection of colons was based on surgical availability. All samples were frozen at  $-70^{\circ}\text{C}$  in Minimal Essential Medium with 10% DMSO until use. The mean patient age within each group was: Non-Progressors: 45.0 (range: 23–59) and Progressors: 41.2 (range: 31–61). The mean year-duration of UC within each group was: Non-Progressors: 10.8 (range: 0.25–20), Progressors: 15.5 (range: 4–29). Additional patient information is listed in Fig. S2. For the whole-colon mapping study, biopsies taken at time of colectomy were obtained from a UC Progressor of unknown age and disease duration. In all cases, colonic epithelial cells were isolated from a  $\approx 9\text{ mm}^2$  portion of each biopsy by EDTA shakeoff; this method yields 90% enrichment for epithelial cells (2). DNA from the epithelial cell isolate and residual stroma of each biopsy was extracted by silica filtration column (Qiagen) and quantified by Nanodrop UV spectroscopy (Thermo Scientific). Stromal DNA was not included in the latter two mapping studies. An adjacent portion of each biopsy was fixed and sectioned for histology.

**Polyguanine Tract-Length Genotyping.** A BLAST search (3) of NCBI build 36 of the human genome was used to identify polyguanine tracts of 12 or more residues in length. PCR primers were designed to flank each tract (Fig. S1) and examined in silico (<http://genome.ucsc.edu>) to confirm predicted amplification of a unique, non-coding product between 90 and 250 base-pairs in length. Oligonucleotides were synthesized by Operon or Applied Biosystems. All forward primers integrated a 5' fluorescent dye (6-FAM, NED or HEX), and reverse primers contained GTT-TCTT on the 5' end to minimize genotyping artifacts due to the terminal deoxynucleotidyl transferase activity of Taq DNA polymerase (4). PCR reactions ( $5\ \mu\text{l}$ ) containing 4 ng genomic DNA were prepared in robotically-loaded 384 well plates, and amplification was carried out for 42 cycles using Taq DNA polymerase (Qiagen). PCR fragments were resolved with an ABI PRISM 3730xl Genetic Analyzer. All genotypes were repeated in duplicate. Electropherograms were analyzed with ABI GeneMapper 4.0 software in a fully blinded fashion using the PeakSeeker approach (5). For each marker, the allele lengths most commonly observed in a set of samples derived from a single patient was defined as the consensus genotype. Genotypes differing from the consensus were considered mutant. If both replicates for a sample produced robust signals and yielded the same genotype, or if only one replicate generated good signal and was equal to the consensus genotype, the result was recorded. If only one replicate produced sufficient signal and suggested a mutant genotype, or if there was a discrepancy between genotypes of the two replicates, the allele lengths were resolved using three additional PCR amplifications. If neither replicate produced a robust signal, the genotype was marked as "X" and not repeated. Some amplification failures were sporadic; others were systematically related to certain PCR amplicons. Progressor and Non-Progressor DNA samples were handled identically in that they were amplified in intermingled wells on the same PCR plates and genotyped blindly.

1. Riddell RH, et al. (1983) Dysplasia in inflammatory bowel disease: standardized classification with provisional clinical applications. *Hum Pathol* 14(11):931–968.
2. Rabinovitch PS, et al. (1999) Pancolonic chromosomal instability precedes dysplasia and cancer in ulcerative colitis. *Cancer Res* 59(20):5148–5153.
3. Altschul SF, et al. (1997) Gapped BLAST and PSI-BLAST: a new generation of protein database search programs. *Nucleic Acids Research* 25(17):3389–3402.

4. Brownstein MJ, Carpten JD, Smith JR (1996) Modulation of non-templated nucleotide addition by Taq DNA polymerase: primer modifications that facilitate genotyping. *BioTechniques* 20(6):1004–1006, 1008–1010.
5. Thompson JM, Salipante SJ (2009) PeakSeeker: a program for interpreting genotypes of mononucleotide repeats. *BMC Res Notes* 2:17.

## Polyguanine amplicons

| <u>Amplicon #</u> | <u>Forward Sequence (5'-3')</u> | <u>Fwd 5' Dye</u> | <u>Reverse sequence (5'-3')</u>     | <u>Accession #</u> | <u>Chromosome</u> |
|-------------------|---------------------------------|-------------------|-------------------------------------|--------------------|-------------------|
| 22                | cctatattcccagctacagctacac       | 6-FAM             | GTTTCTTgggtatatagtgatagtggtttgttc   | NW_926839          | 17                |
| 41                | tcttttgactctaaagtccttagacc      | NED               | GTTTCTTgtttatagtcgcccttttgttaaagg   | NW_925495          | 13                |
| 18                | atgatggctccagagctcatagaac       | 6-FAM             | GTTTCTTgtgcagatcaggaaggagaattg      | NW_926839          | 17                |
| 26                | gactgacactgttgtaataccaagg       | 6-FAM             | GTTTCTTggtttcaaacattacaagatcaagg    | NW_926018          | 16                |
| 27                | ctgatgagggacaggaatctcac         | 6-FAM             | GTTTCTTatgaccaggacaggtacag          | NW_926018          | 16                |
| 30                | ggagtattgctaggagggttttc         | HEX               | GTTTCTTcgctatatgggtagtcactatctgg    | NW_925884          | 15                |
| 47                | ttggttaaggccctaaatttgaac        | NED               | GTTTCTTttctgcattttatagtgctttcc      | NW_925351          | 12                |
| 34                | gttataaaagatgcaactgctcagg       | HEX               | GTTTCTTgtagctactgattctggttccctctg   | NW_925561          | 14                |
| 45                | aaggtctgagataagctccagaatc       | NED               | GTTTCTTtacctagagttcgggtcctgaag      | NW_925351          | 12                |
| 54                | ctaaagttaaggacacagactgaagg      | NED               | GTTTCTTgagaccttacaggaacagaagaatc    | NW_924606          | 10                |
| 2                 | tcatcaggttactaggcaatattagg      | HEX               | GTTTCTTtctctgccctgaccagggtctac      | NW_927705          | X                 |
| 25                | cacactccttggtgacagctgc          | 6-FAM             | GTTTCTTgtcaggtcagtcctgggttc         | NW_926018          | 16                |
| 32                | ggaggttgactaaggatctcacag        | HEX               | GTTTCTTtactactcaggacatcacacacaac    | NW_925884          | 15                |
| 46                | ccgttataaaaagtctcaggtttg        | NED               | GTTTCTTtatactaacctctcctcaggtttcc    | NW_925351          | 12                |
| 21                | taccaggtgtaagatctgaaaag         | 6-FAM             | GTTTCTTaggaaaccttactactgctgaaag     | NW_926839          | 17                |
| 52                | cagctaaattttctgttttagtcagg      | NED               | GTTTCTTgcagtcagaacccatcac           | NW_925106          | 11                |
| 36                | gggcattcaggaccactagg            | HEX               | GTTTCTTgttcagagcgtctctgtgttc        | NW_925561          | 14                |
| 89                | tagtcacctgttcagcacctaatac       | HEX               | GTTTCTTgtgactatccactcttgccttg       | NW_922217          | 4                 |
| 78                | caaagagtgaacagactatcgacttc      | HEX               | GTTTCTTaaccttttagatttacagaaaaatgagc | NT_079595          | 7                 |
| 84                | agggtgctgagaataaagaagatgaag     | HEX               | GTTTCTTatggattcctggtagatgttg        | NW_922984          | 6                 |
| 88                | aatttcagctctctgagtgatgcc        | HEX               | GTTTCTTcatttgcagcaatttctcttag       | NW_922217          | 4                 |
| 58                | gtaagtaaatcaatgaatgtggttg       | 6-FAM             | GTTTCTTataaattttatggatttctgttg      | NW_924606          | 10                |
| 64                | gtaatcaccatcaatttggcaatttac     | 6-FAM             | GTTTCTTgactaagggaggagaatcactagaac   | NW_924062          | 9                 |
| 75                | catgagttcaattgttttttagtc        | HEX               | GTTTCTTcattctgagataaggggtcaaag      | NT_079595          | 7                 |
| 66                | acatgtacattcagttcactgttaagc     | 6-FAM             | GTTTCTTtagctttgtctagttttgtgtgtg     | NW_923929          | 8                 |
| 87                | tacatgaaattctcaatgattacaacg     | HEX               | GTTTCTTaaagatctattccatccattgactc    | NW_922217          | 4                 |
| 57                | ccgaatctaaattgaaaacacaaag       | 6-FAM             | GTTTCTTtttttagtagaaatgggtttcacc     | NW_924606          | 10                |
| 104               | agttacgacaatcaaaaatgtctctg      | 6-FAM             | GTTTCTTgagatgacctagaccactgattctc    | NW_927128          | 1                 |
| 81                | gtgaactgtgtttctgctactacactc     | HEX               | GTTTCTTtacaaaaatcatggtttagtttctcc   | NW_922984          | 6                 |
| 103               | gggcagttataaaaactatagaataccc    | 6-FAM             | GTTTCTTtacactctgtgcattttccttttc     | NW_921585          | 2                 |
| 83                | cagtgctcattcatctttgtcattc       | HEX               | GTTTCTTcaaaaactcaaaaatgtctaatggag   | NW_922984          | 6                 |
| 105               | ttaccttaacattcagcttctctctg      | 6-FAM             | GTTTCTTtagatatgccactttgtcatctacag   | NW_927128          | 1                 |
| 74                | taacaagggaaatgtaaggacttatg      | 6-FAM             | GTTTCTTtatttagtccagattaatgacaaagg   | NT_079595          | 7                 |
| 102               | ttggtattctattatagcagcctgaac     | 6-FAM             | GTTTCTTcattacacatactattaccaccaggac  | NW_921585          | 2                 |
| 107               | ctctcatgactagctaaaaatgattc      | 6-FAM             | GTTTCTTgccagactttattctattttgtc      | NW_927128          | 1                 |

## NCI Bethesda Panel panel MSI amplicons

| <u>Amplicon #</u> | <u>Forward Sequence (5'-3')</u> | <u>Fwd 5' Dye</u> | <u>Reverse sequence (5'-3')</u> | <u>Genbank #</u> | <u>Chromosome</u> |
|-------------------|---------------------------------|-------------------|---------------------------------|------------------|-------------------|
| D17S250           | ggaagaatcaaatagacaat            | HEX               | gctggccatatatatatttaaacc        | 177030           | 17                |
| BAT26             | tgactacttttgacttcagcc           | 6-FAM             | aaccattcaacattttaacc            | 9834505          | 2                 |
| D2S123            | aaacaggatgctgccttta             | 6-FAM             | ggactttccacctatgggac            | 187953           | 2                 |
| BAT25             | tcgctccaagaatgtaagt             | 6-FAM             | tctgcattttaactatggctc           | 9834508          | 4                 |

**Fig. S1.** Primer sequences and marker location for polyguanine homopolymer loci and Bethesda panel MSI markers. Capitalized bases represent a nonhomologous 5' "pigtail" sequence added to limit genotyping artifacts.

**Fig. S2.** Complete genotyping data set. Horizontal boxes represent individual cases grouped by disease status: UC Non-Progressor (yellow), UC Progressor (red). Biopsies were separated into epithelial and stromal fractions and genotyped separately. Rows within each case indicate specific fractions of individual biopsies. Relevant clinical data for each individual/biopsy is given. Vertical columns making up the bulk of the table indicate the length of alleles for each polyguanine marker. The four rightmost marker columns (pink headings) correspond to nonpolyguanine Bethesda Panel MSI markers. "X" indicates unsuccessful genotyping. Genotypes differing from the consensus genotype for that individual are shown in red. Markers where at least one mutant genotype was identified in an individual are highlighted; epithelial samples are shown in violet, stromal samples in blue. Summary data by case and by marker are listed at the far right and bottom, respectively. Genotyping was performed under fully blinded conditions.



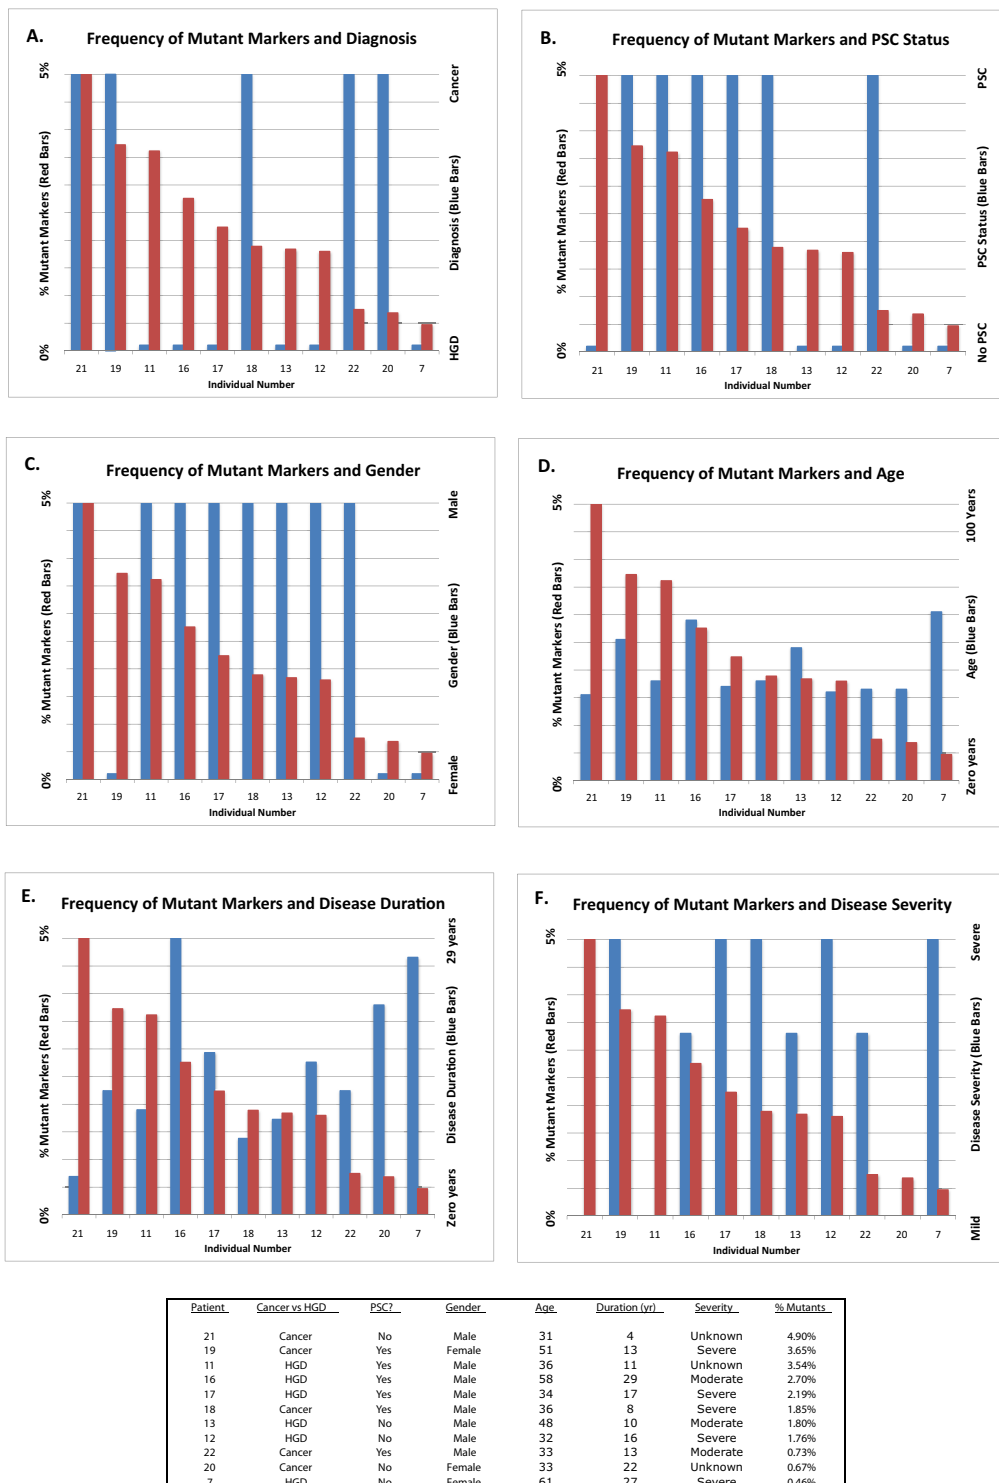

**Fig. S4.** UC progressors by prevalence of mutant genotypes detected and additional clinical parameters. For each panel, red bars indicate the percentage of genotypings within an individual differing from consensus, and blue bars indicate an additional clinical feature: (A) highest grade histological diagnosis: HGD or cancer, (B) presence or absence of concurrent PSC, (C) gender, (D) age at time of sampling, (E) duration of clinically manifest ulcerative colitis, (F) symptomatic severity of ulcerative colitis.



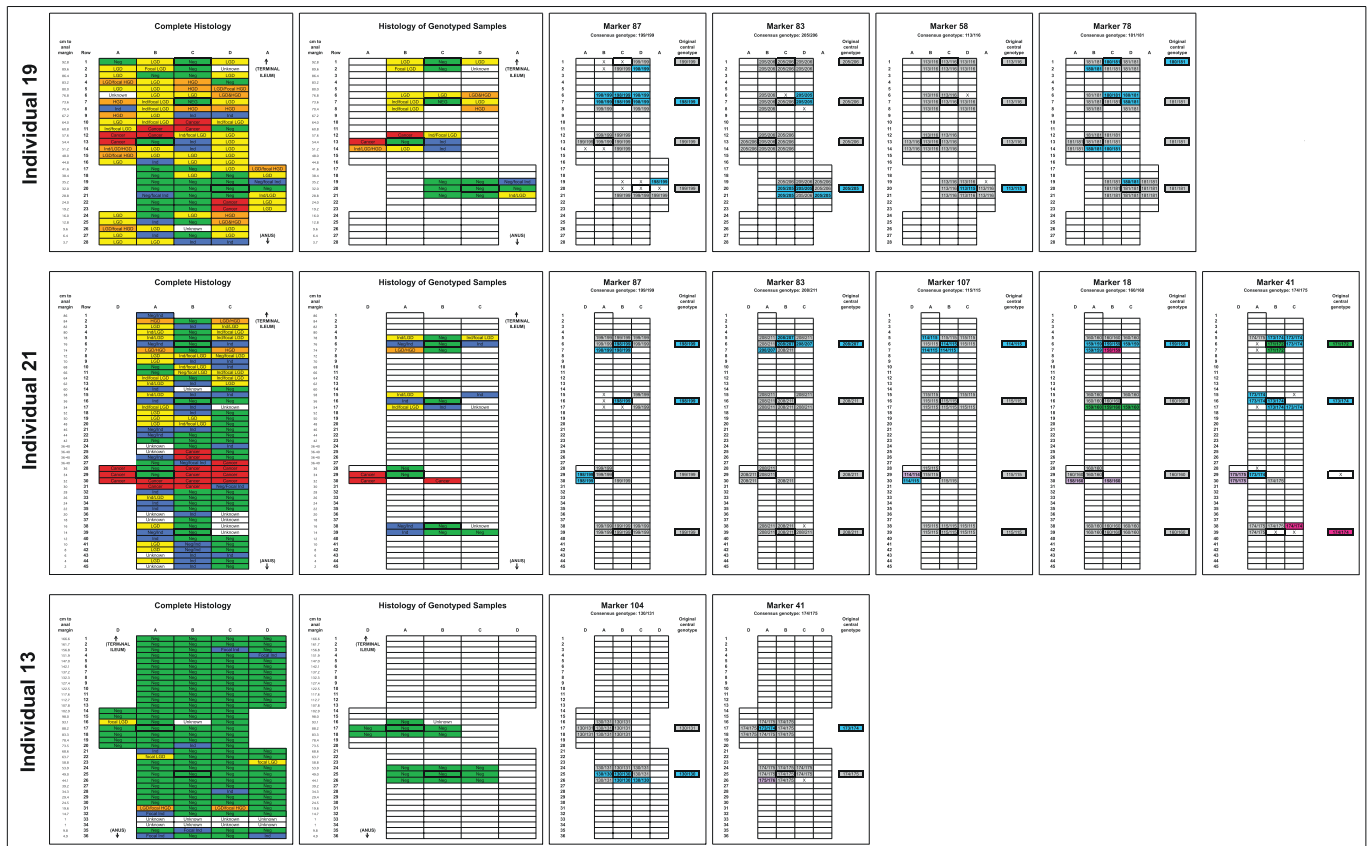

**Fig. S6.** Clonal patches identified by polyguanine mapping (complete data). Epithelium from biopsies surrounding each of 10 samples used in the initial study were genotyped at markers sites previously found to be mutant in a subset of the original 10 samples (outlined boxes). Longitudinally opened colectomy specimens from three individuals are diagrammed separately. Colectomy diagrams are divided into boxes representing individual biopsies measuring  $\approx 9 \text{ mm}^2$ , taken at evenly spaced intervals within an alphanumeric grid. The histological diagnosis from each biopsy is indicated at left: NEG, negative for dysplasia; IND, indefinite for dysplasia; LGD, low grade dysplasia; HGD, high grade dysplasia; CAN, cancer; ?, no data. The genotypes of biopsies for specific polyguanine markers are indicated at right. Empty boxes represent biopsies not genotyped, "X" indicates unsuccessful genotyping. Gray fields indicate biopsies with the consensus genotype for the marker, and different colors represent distinct mutant genotypes within an individual. Clustering of identical mutant genotypes in adjacent biopsies suggests large, clonally derived patches. Within each panel, the previously determined genotypes of the initial biopsies are listed to the right. Genotypes of surrounding biopsies and repeat genotypes of central biopsies are shown. Repeat testing of central biopsies uniformly obtained the same genotype as previously identified.

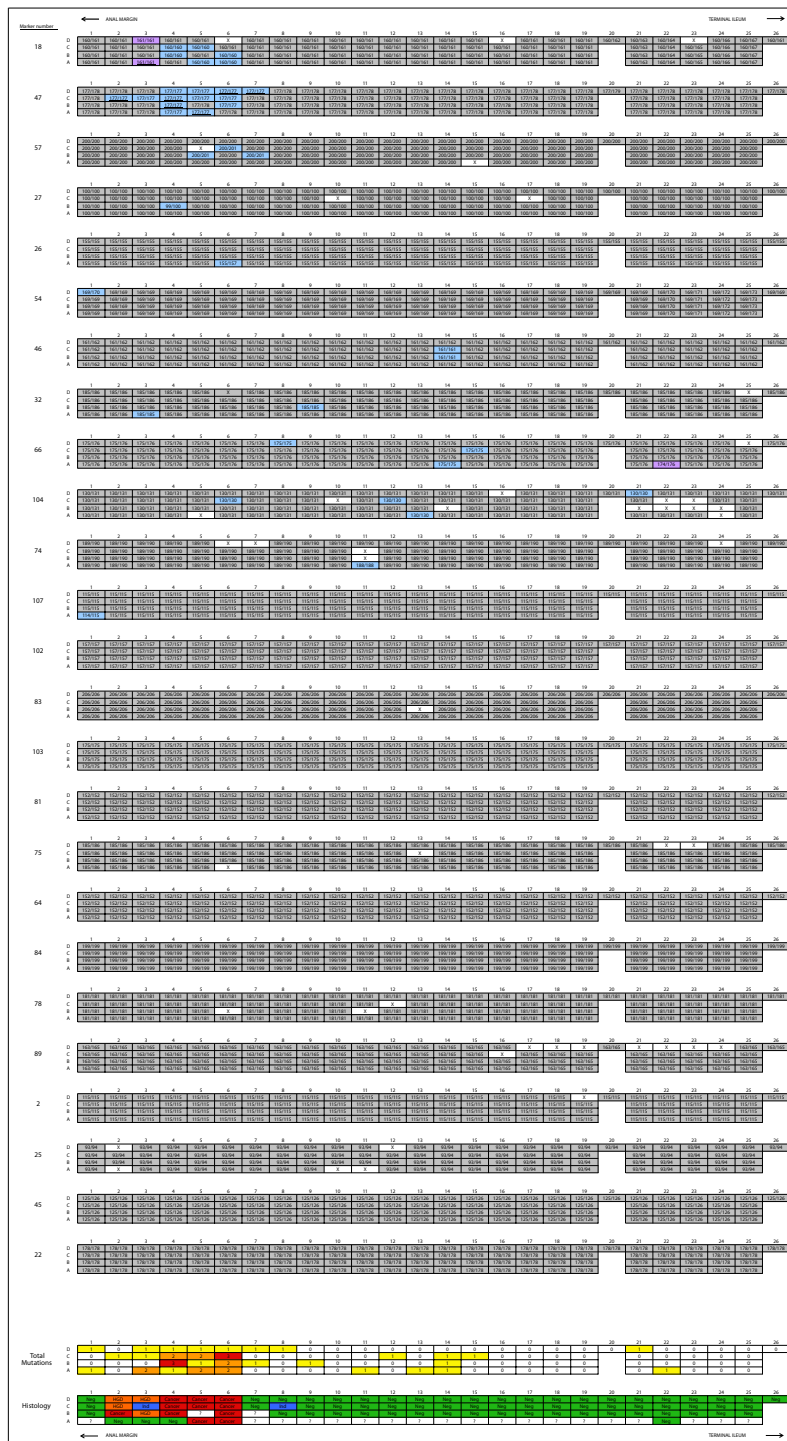

**Fig. S7.** Full data set from polyguanine mapping of a complete UC Progressor colon. A longitudinally opened colectomy specimen is diagrammed with small boxes representing evenly spaced biopsies measuring  $\approx 9 \text{ mm}^2$  within an alphanumeric grid. The histological diagnosis of each biopsy is indicated at far right: NEG, negative for dysplasia; IND, indefinite dysplasia; HGD, high grade dysplasia; CAN, cancer; ?, no data. Biopsy genotypes for various polyguanine marker are indicated in separate grids. "X" indicates unsuccessful genotyping. Gray fields indicate biopsies with the consensus genotype for the marker, and different colors represent distinct mutant genotypes. Underlined genotypes indicate biopsies where a mixture of consensus and mutant genotypes were observed, suggesting a mixed population of cells with different genotypes. The total number of mutant genotypes identified across all markers is reported for each biopsy (heat map). Large, clonally derived patches identified by three markers were observed near the cancer site. Numerous smaller patches were detected throughout the nondysplastic portions of the colon.



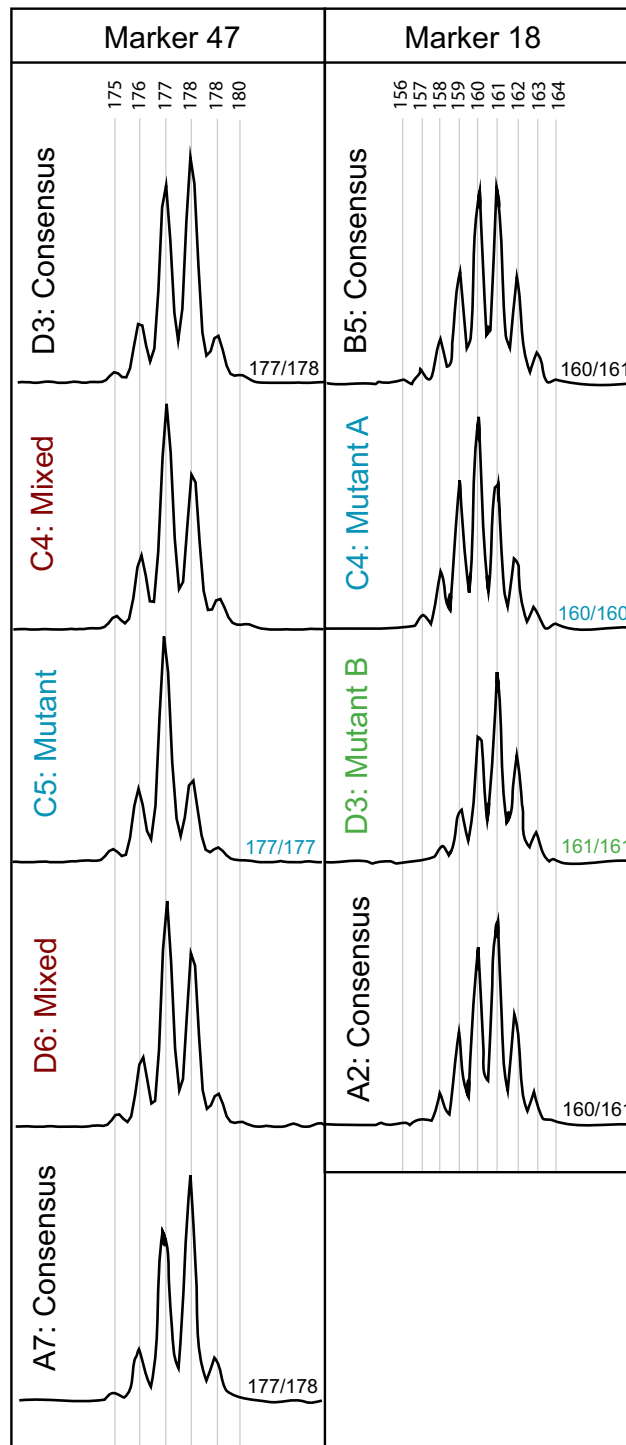

**Fig. S8.** Example electropherograms from a complete colon map showing consensus, mutant and mixed polyguanine tract genotypes. X-axis indicates product length (bp), y-axis represents signal intensity. Allele lengths are indicated, with mutant alleles in red. Non-indicated peaks are an artifact of PCR amplification (“stutter”). For each polyguanine marker, the “consensus” genotype is that most commonly observed among biopsies from a single patient. Mutant genotypes are those that differ from the consensus with respect to the length of at least one allele. “Mixed” genotypes reflect a combination of consensus and mutant genotypes, and likely occur when a biopsy contains a mixture of cells with both consensus and a mutant genotype. Product length scale is listed at the top of each marker column. The alphanumeric code to the left of each electropherogram corresponds to the biopsy grid position in Fig. 4 and Fig. S7. Genotype calls are indicated to the right. Genotype assignments are based on the major peak(s) of each electropherogram. Adjacent “stutter” peaks are an artifactual consequence of PCR amplification.
